# Supplementary material for: Energy Expenditure of Disaster Relief Operations Estimated Using a Tri-Axial Accelerometer and a Wearable Heart Rate Monitor
Source: MDPI journal article supplement (doi:10.3390/ijerph20095742), 2023-05-08
Supplement: s1 [file s1]

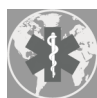

Supplemental file Table S1. Activity Log

1

| Activities | (circle all that apply) |         |     |      |      |              |                              |        | Description of Activities' detail |                                                                                   |
|------------|-------------------------|---------|-----|------|------|--------------|------------------------------|--------|-----------------------------------|-----------------------------------------------------------------------------------|
| example    | moving                  | standby | nap | rest | meal | firefighting | emergency medical activities | rescue | logistical support                | ( Removing debris, carrying victims, shoveling<br>Excavating with shovels, etc. ) |
| 8:00       | moving                  | standby | nap | rest | meal | firefighting | emergency medical activities | rescue | logistical support                | ( )                                                                               |
| 8:30       | moving                  | standby | nap | rest | meal | firefighting | emergency medical activities | rescue | logistical support                | ( )                                                                               |
| 9:00       | moving                  | standby | nap | rest | meal | firefighting | emergency medical activities | rescue | logistical support                | ( )                                                                               |
| 9:30       | moving                  | standby | nap | rest | meal | firefighting | emergency medical activities | rescue | logistical support                | ( )                                                                               |
| 10:00      | moving                  | standby | nap | rest | meal | firefighting | emergency medical activities | rescue | logistical support                | ( )                                                                               |
| 10:30      | moving                  | standby | nap | rest | meal | firefighting | emergency medical activities | rescue | logistical support                | ( )                                                                               |
| 11:00      | moving                  | standby | nap | rest | meal | firefighting | emergency medical activities | rescue | logistical support                | ( )                                                                               |
| 11:30      | moving                  | standby | nap | rest | meal | firefighting | emergency medical activities | rescue | logistical support                | ( )                                                                               |
| 12:00      | moving                  | standby | nap | rest | meal | firefighting | emergency medical activities | rescue | logistical support                | ( )                                                                               |
| 12:30      | moving                  | standby | nap | rest | meal | firefighting | emergency medical activities | rescue | logistical support                | ( )                                                                               |
| 13:00      | moving                  | standby | nap | rest | meal | firefighting | emergency medical activities | rescue | logistical support                | ( )                                                                               |
| 13:30      | moving                  | standby | nap | rest | meal | firefighting | emergency medical activities | rescue | logistical support                | ( )                                                                               |
| 14:00      | moving                  | standby | nap | rest | meal | firefighting | emergency medical activities | rescue | logistical support                | ( )                                                                               |
| 14:30      | moving                  | standby | nap | rest | meal | firefighting | emergency medical activities | rescue | logistical support                | ( )                                                                               |
| 15:00      | moving                  | standby | nap | rest | meal | firefighting | emergency medical activities | rescue | logistical support                | ( )                                                                               |
| 15:30      | moving                  | standby | nap | rest | meal | firefighting | emergency medical activities | rescue | logistical support                | ( )                                                                               |
| 16:00      | moving                  | standby | nap | rest | meal | firefighting | emergency medical activities | rescue | logistical support                | ( )                                                                               |
| 16:30      | moving                  | standby | nap | rest | meal | firefighting | emergency medical activities | rescue | logistical support                | ( )                                                                               |
| 17:00      | moving                  | standby | nap | rest | meal | firefighting | emergency medical activities | rescue | logistical support                | ( )                                                                               |
| 17:30      | moving                  | standby | nap | rest | meal | firefighting | emergency medical activities | rescue | logistical support                | ( )                                                                               |
| 18:00      | moving                  | standby | nap | rest | meal | firefighting | emergency medical activities | rescue | logistical support                | ( )                                                                               |

|       |        |         |     |      |      |              |                              |        |                    |     |
|-------|--------|---------|-----|------|------|--------------|------------------------------|--------|--------------------|-----|
| 18:30 | moving | standby | nap | rest | meal | firefighting | emergency medical activities | rescue | logistical support | ( ) |
| 19:00 | moving | standby | nap | rest | meal | firefighting | emergency medical activities | rescue | logistical support | ( ) |
| 19:30 | moving | standby | nap | rest | meal | firefighting | emergency medical activities | rescue | logistical support | ( ) |
| 20:00 | moving | standby | nap | rest | meal | firefighting | emergency medical activities | rescue | logistical support | ( ) |
| 20:30 | moving | standby | nap | rest | meal | firefighting | emergency medical activities | rescue | logistical support | ( ) |
| 21:00 | moving | standby | nap | rest | meal | firefighting | emergency medical activities | rescue | logistical support | ( ) |
| 21:30 | moving | standby | nap | rest | meal | firefighting | emergency medical activities | rescue | logistical support | ( ) |
| 22:00 | moving | standby | nap | rest | meal | firefighting | emergency medical activities | rescue | logistical support | ( ) |
| 22:30 | moving | standby | nap | rest | meal | firefighting | emergency medical activities | rescue | logistical support | ( ) |
| 23:00 | moving | standby | nap | rest | meal | firefighting | emergency medical activities | rescue | logistical support | ( ) |
| 23:30 | moving | standby | nap | rest | meal | firefighting | emergency medical activities | rescue | logistical support | ( ) |
| 0:00  | moving | standby | nap | rest | meal | firefighting | emergency medical activities | rescue | logistical support | ( ) |
| 0:30  | moving | standby | nap | rest | meal | firefighting | emergency medical activities | rescue | logistical support | ( ) |
| 1:00  | moving | standby | nap | rest | meal | firefighting | emergency medical activities | rescue | logistical support | ( ) |
| 1:30  | moving | standby | nap | rest | meal | firefighting | emergency medical activities | rescue | logistical support | ( ) |
| 2:00  | moving | standby | nap | rest | meal | firefighting | emergency medical activities | rescue | logistical support | ( ) |
| 2:30  | moving | standby | nap | rest | meal | firefighting | emergency medical activities | rescue | logistical support | ( ) |
| 3:00  | moving | standby | nap | rest | meal | firefighting | emergency medical activities | rescue | logistical support | ( ) |
| 3:30  | moving | standby | nap | rest | meal | firefighting | emergency medical activities | rescue | logistical support | ( ) |
| 4:00  | moving | standby | nap | rest | meal | firefighting | emergency medical activities | rescue | logistical support | ( ) |
| 4:30  | moving | standby | nap | rest | meal | firefighting | emergency medical activities | rescue | logistical support | ( ) |
| 5:00  | moving | standby | nap | rest | meal | firefighting | emergency medical activities | rescue | logistical support | ( ) |
| 5:30  | moving | standby | nap | rest | meal | firefighting | emergency medical activities | rescue | logistical support | ( ) |
| 6:00  | moving | standby | nap | rest | meal | firefighting | emergency medical activities | rescue | logistical support | ( ) |

|       |        |         |     |      |      |              |                              |        |                    |     |
|-------|--------|---------|-----|------|------|--------------|------------------------------|--------|--------------------|-----|
| 6:30  | moving | standby | nap | rest | meal | firefighting | emergency medical activities | rescue | logistical support | ( ) |
| 7:00  | moving | standby | nap | rest | meal | firefighting | emergency medical activities | rescue | logistical support | ( ) |
| 7:30  | moving | standby | nap | rest | meal | firefighting | emergency medical activities | rescue | logistical support | ( ) |
| 8:00  | moving | standby | nap | rest | meal | firefighting | emergency medical activities | rescue | logistical support | ( ) |
| 8:30  | moving | standby | nap | rest | meal | firefighting | emergency medical activities | rescue | logistical support | ( ) |
| 9:00  | moving | standby | nap | rest | meal | firefighting | emergency medical activities | rescue | logistical support | ( ) |
| 9:30  | moving | standby | nap | rest | meal | firefighting | emergency medical activities | rescue | logistical support | ( ) |
| 10:00 | moving | standby | nap | rest | meal | firefighting | emergency medical activities | rescue | logistical support | ( ) |
| 10:30 | moving | standby | nap | rest | meal | firefighting | emergency medical activities | rescue | logistical support | ( ) |
| 11:00 | moving | standby | nap | rest | meal | firefighting | emergency medical activities | rescue | logistical support | ( ) |
| 11:30 | moving | standby | nap | rest | meal | firefighting | emergency medical activities | rescue | logistical support | ( ) |
| 12:00 | moving | standby | nap | rest | meal | firefighting | emergency medical activities | rescue | logistical support | ( ) |
| 12:30 | moving | standby | nap | rest | meal | firefighting | emergency medical activities | rescue | logistical support | ( ) |
| 13:00 | moving | standby | nap | rest | meal | firefighting | emergency medical activities | rescue | logistical support | ( ) |
| 13:30 | moving | standby | nap | rest | meal | firefighting | emergency medical activities | rescue | logistical support | ( ) |
| 14:00 | moving | standby | nap | rest | meal | firefighting | emergency medical activities | rescue | logistical support | ( ) |
| 14:30 | moving | standby | nap | rest | meal | firefighting | emergency medical activities | rescue | logistical support | ( ) |
| 15:00 | moving | standby | nap | rest | meal | firefighting | emergency medical activities | rescue | logistical support | ( ) |
| 15:30 | moving | standby | nap | rest | meal | firefighting | emergency medical activities | rescue | logistical support | ( ) |
| 16:00 | moving | standby | nap | rest | meal | firefighting | emergency medical activities | rescue | logistical support | ( ) |
| 16:30 | moving | standby | nap | rest | meal | firefighting | emergency medical activities | rescue | logistical support | ( ) |
| 17:00 | moving | standby | nap | rest | meal | firefighting | emergency medical activities | rescue | logistical support | ( ) |
